# Supplementary material for: Prediction of Hysteretic Matric Potential Dynamics Using Artificial Intelligence: Application of Autoencoder Neural Networks
Source: Copernicus journal article supplement (doi:10.5194/egusphere-2024-407), 2024-03-04
Supplement: Supplementary file [file egusphere-2024-407-AC1-supplement.pdf]

1 **REVIEW 1 (our reply in blue)**

2 **Summary**

3 Aqel et al. present a neural network (NN) based approach to predict matric potential from soil water  
4 content observations. Using an autoencoder, they extract the most relevant features of the soil water  
5 retention dynamics. They input their results into a deep neural network (DNN), which increases  
6 the transferability of the DNN.

7 **Assessment**

8 The approach presented in this paper is convincing. The manuscript is well-written. Prediction of  
9 hysteresis in soil water retention is of interest to the soil hydrology and soil physics community.

10 I don't have major comments. Thus, I recommend accepting the manuscript after minor revisions.  
11 I have some minor comments below.

12 **We thank the reviewer for the positive feed-back and the specific comments (they are addressed**  
13 **below).**

14 **Nash-Sutcliffe efficiency**

15 The Nash-Sutcliffe coefficient tends to emphasise maxima in a time series, which might bias the  
16 results. An additional interesting metric would be the Kling-Gupta efficiency (Knoben et al., 2019;  
17 doi: 10.5194/hess-23-4323-2019).

18 **Thank you for the input. We computed the Kling-Gupta Efficiency (KGE) for the nine sites (see Table**  
19 **1 on the next page).**

20 **KGE was developed to address some limitations of the Nash-Sutcliffe Efficiency (NSE) by**  
21 **incorporating three components: correlation, bias, and variability (Liu, 2020;**  
22 **<https://doi.org/10.1016/j.jhydrol.2020.125488> ). The KGE provides a more comprehensive assessment**  
23 **of model performance by balancing these aspects. The value of KGE ranges from negative infinity to**  
24 **1, with a value of 1 indicating perfect agreement between observed and modeled data.**

25 **In a study by Gupta et al. (2009; <https://doi.org/10.1016/j.jhydrol.2009.08.003>), a KGE of 0.6 was**  
26 **considered acceptable for streamflow simulations. In our analysis, we follow Towner et al. (2019,**  
27 **<https://hess.copernicus.org/articles/23/3057/2019/>) that used KGE > 0.75 as threshold for "good" model**

28 performance. This threshold suggests that the model accurately captures the dynamics of the observed  
 29 data, including the mean, variability, and correlation structure.

### 30 **KGE values for deep neural network modeling without autoencoder**

31 After running the deep neural network model (section 3.1), the KGE values were as shown in Table 1.  
 32 Only two sites, Matzendorf (site #7) and Etziken (site #5), from the nine sites had a KGE value of less  
 33 than 0.75 in the validation (KGE > 0.75 for training). These two sites were mentioned in section 3.1 as  
 34 sites needing more training data, which follows the expected scenario by NSE.

35 In conclusion, the KGE-analysis defines good model performance for seven out of nine sites (four sites  
 36 according to NSE-criterion of  $NSE \geq 0.80$ ).

37 *Table 1: Statistical assessment of calibration (1825 days, until year 2019/2020) and validation results (years 2018/2019/2020*  
 38 *until years 2020/2021/2022) for nine sites. The holdout dataset was part of the training period and includes 548 days (30 %*  
 39 *of calibration).*

| Location                        | AUV (-) | Training (holdout) |           |         | Validation |           |         |
|---------------------------------|---------|--------------------|-----------|---------|------------|-----------|---------|
|                                 |         | NSE (-)            | RMSE (cm) | KGE (-) | NSE (-)    | RMSE (cm) | KGE (-) |
| 1 Aetigkofen                    | 1.95    | 0.92               | 48        | 0.91    | 0.89       | 60        | 0.87    |
| 2 Bellach                       | 7.00    | 0.70               | 98        | 0.84    | 0.62       | 125       | 0.77    |
| 3 Breitenbach <sup>a, b</sup>   | 3.56    | 0.86               | 82        | 0.78    | 0.83       | 96        | 0.84    |
| 4 Dulliken <sup>a</sup>         | 2.19    | 0.82               | 55        | 0.86    | 0.73       | 103       | 0.76    |
| 5 Etziken <sup>a</sup>          | 1.90    | 0.88               | 56        | 0.90    | 0.75       | 70        | 0.65    |
| 6 Hofstetten -Flüh <sup>b</sup> | 5.59    | 0.76               | 90        | 0.79    | 0.63       | 123       | 0.81    |
| 7 Matzendorf                    | 6.39    | 0.76               | 83        | 0.79    | 0.59       | 133       | 0.63    |
| 8 Stüsslingen                   | 4.49    | 0.80               | 71        | 0.84    | 0.80       | 98        | 0.85    |
| 9 Zunzgen                       | 6.44    | 0.87               | 62        | 0.82    | 0.83       | 73        | 0.77    |

40 <sup>a</sup> forest sites.

41 <sup>b</sup> Sites with limited available data. For those sites, only 1200 days were used for training; Within this training period, a subset  
 42 of 360 randomly selected days was designated as a holdout dataset; the validation period for those specific sites was from  
 43 2018/2019 to 2022.

### 44 **KGE values for deep neural network using the autoencoder value (AUC-DNN)**

45 The results of the Kling-Gupta Efficiency (KGE) for the Deep Neural Network Autoencoder (AUC-  
 46 DNN) model in section 3.3 show that three out of the six validation sites have a KGE value less than  
 47 0.75 (Table 2, next page). The two sites Hofstetten-Flüh (site #6) and Matzendorf (site #7) have the  
 48 lowest NSE values, indicating that the model captures the general dynamics of these site rather than the  
 49 exact values. This is consistent with our conclusion in section 3.3. The third site, Breitenbach (site #3),  
 50 was identified in section 3.3 as a site where underestimation is expected (see Figure 7 in manuscript),  
 51 which explains why its KGE value is below the threshold of 0.75.

52 *Table 2: AUC-DNN Model performance for the period 2012-2022. Three training sites were used to build the AUC-DNN*  
53 *model that was then applied for the other six sites. The sites are listed according to the corresponding autoencoder value*  
54 *(AUV). The asterisks mark the sites with forest; The AUV was scaled from 1.9 to 7.0 to simplify input. Alternatively, scaled*  
55 *values ranging from 0 to 1 could also be utilized.*

| <b>Location</b>   | <b>AUV</b> | <b>AUV (type)</b> | <b>used as</b> | <b>NSE (-)</b> | <b>RMSE (cm)</b> | <b>KGE (-)</b> |
|-------------------|------------|-------------------|----------------|----------------|------------------|----------------|
| 5 Etziken*        | 1.90       | Type 1            | Training site  | 0.82           | 70               | 0.81           |
| 1 Aetgikofen      | 1.95       | Type 1            | Validating     | 0.76           | 88               | 0.76           |
| 4 Dulliken*       | 2.19       | Type 1            | Validating     | 0.65           | 100              | 0.77           |
| 3 Breitenbach*    | 3.56       | Transitional      | Validating     | 0.71           | 73               | 0.68           |
| 8 Stüsslingen     | 4.49       | Transitional      | Training site  | 0.85           | 116              | 0.91           |
| 6 Hofstetten-Flüh | 5.59       | Transitional      | Validating     | 0.60           | 113              | 0.72           |
| 7 Matzendorf      | 6.39       | Type 2            | Validating     | 0.58           | 123              | 0.56           |
| 9 Zunzgen         | 6.44       | Type 2            | Validating     | 0.69           | 104              | 0.81           |
| 2 Bellach         | 7.00       | Type 2            | Training site  | 0.71           | 104              | 0.80           |

56

57 Similar to the analysis without autoencoder discussed in the previous paragraph, the KGE-analysis  
58 defines good model performance for more sites than according to the NSE. Accordingly, the NSE-  
59 thresholds for good model performance are more challenging compared to KGE and we focus on NSE  
60 (and not KGE) in the paper.

### 61 **Local nature of the model**

62 The results obtained are from sites that share similar climate and topography. I wonder if this  
63 workflow would work as well in different regions of the world, or if further adjustments must be  
64 made.

65 To show what is needed to apply the workflow for other regions, we used the Deep Neural Network  
66 Autoencoder (AUV-DNN) model described in section 3.3 to predict the matric potential for a site called  
67 ‘Wasen’ in the hilly region around the Napf mountain in Switzerland. Compared to the canton of  
68 Solothurn (the sites presented in the paper), the Napf region has a different geology and is known to be  
69 colder in winter and having more rainfall.

70 The AUV value for Wasen was 2.54 and falls within the range of the training sites (1.90 to 7.00).  
71 Accordingly, we could expect that the soil moisture dynamics was similar to the sites in the canton of  
72 Solothurn. The model was thus able to predict the matric potential with high quality, as shown in the  
73 figure on the next page. The NSE for the model was 0.81, and the KGE was 0.89, indicating that the  
74 model performs well in predicting unseen sites in other locations.

75 However, Wasen is still in Switzerland, with soil texture similar to the training sites. It is expected that  
 76 the model may not perform well for sites with AUV values outside the training range. We commented  
 77 on this in section 4.1 in the revised manuscript.

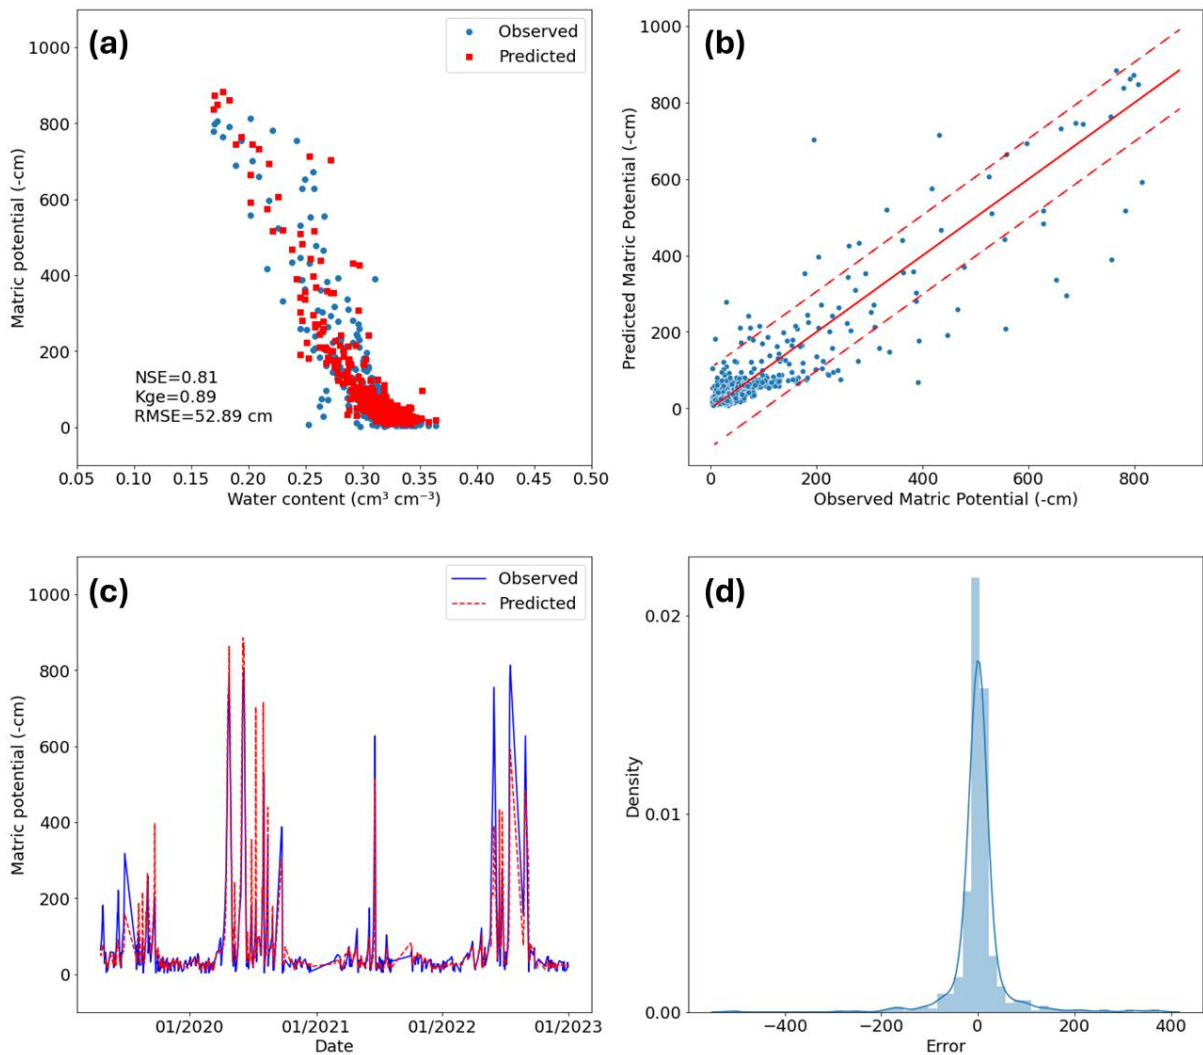

78  
 79 *Figure 1. Evaluation of the Deep Neural Network with Autoencoder (AUC-DNN) model performance at the Wasen site for the*  
 80 *period 2019-2023. (a) Comparison between the expected Soil Water characteristics curve (SWC) and the observed SWC. (b)*  
 81 *Scatter plot that compares observed data points with their corresponding simulated values, providing a visual representation*  
 82 *of the level of conformity to the identity line. The two dashed lines represent the 95% confidence interval around the identity*  
 83 *line, providing a visual assessment of the level of agreement. (c) Time series comparison showing the observed and predicted*  
 84 *matric potential for the entire period. (d) Analysis of the distribution of prediction errors (observed minus modelled value)*  
 85 *using positively mild skewed distribution.*

86 **Physically-based modelling**

87 I partially agree that the reductionist mechanistic models might be unable to account for the full  
 88 complexity inherent in the soil water retention process. Input-agnostic approaches such as neural  
 89 networks surely have an advantage when it comes to predicting matric potential. However,

90 physically-based modelling is also a tool for process understanding that could potentially help us  
91 disentangling the effects of all the interacting processes that control soil water retention. I know  
92 that there are efforts to make machine learning a tool for process understanding as well. Perhaps  
93 the authors could comment briefly on this and place their work in this discussion?

94 We agree with the reviewer that we need physically-based modelling for process understanding. Due  
95 to the complexity of the involved physical processes at the field scale (hysteresis, non-equilibrium,  
96 seasonal dynamics of soil structure), we don't have a yet a physical model to predict these processes.  
97 Machine learning could help to disentangle these effects, for example by classifying periods that are  
98 affected by structural changes and periods that are dominated by non-equilibrium effects. For the  
99 different periods, specific amendments in the description of the physical process and properties could  
100 be developed (i.e., the application of season-dependent and rate-dependent soil hydraulic properties).

101 Alternatively, physically-induced machine learning (PIML) should be applied in the future, to link the  
102 knowledge we have on the physical processes with the data-driven machine learning approaches. There  
103 are recent applications of PIML in hydrology: Degen et al. (2023;  
104 <https://gmd.copernicus.org/articles/16/7375/2023/>) replaced the complex numerical simulations of the  
105 Richards equation with a surrogate model using a set of physically-based basis functions; Bhasme et al.  
106 (2022; <https://doi.org/10.1016/j.jhydrol.2022.128618>) combined a set of simple physically-based mass  
107 balance equations with machine-learning to predict successfully evapotranspiration and streamflow  
108 from a catchment. A similar approach is possible for the problem addressed in our paper: we could  
109 combine the physically-based description of the Richards equation with machine-learning based  
110 hydraulic functions that change continuously with season or with the drainage rate. Such an approach  
111 would provide insight in the changing hydraulic functions and test the validity of the Richards equation  
112 (to see if other processes like macropore flow must be included). We will test this in the future but did  
113 not address it in this paper.
