# Supplementary material for: Prediction of Hysteretic Matric Potential Dynamics Using Artificial Intelligence: Application of Autoencoder Neural Networks
Source: Copernicus journal article supplement (doi:10.5194/egusphere-2024-407), 2024-03-04
Supplement: Supplementary file [file egusphere-2024-407-AC2-supplement.pdf]

1 **REVIEW 2 (our reply in blue)**

2 **General Comments**

3 This manuscript presents an approach for predicting soil water potential and its hysteresis under natural  
4 field conditions by combining deep neural networks (DNN) with autoencoder neural networks. This  
5 integration leverages the strengths of both methods, with the autoencoder effectively compressing and  
6 capturing site-specific features of soil moisture dynamics, and the DNN utilizing these features to  
7 enhance prediction accuracy.

8 Overall, the method is promising and convincing, and the manuscript is well-organized and clearly  
9 written. I have only a few concerns and suggestions, primarily regarding the model's generalization  
10 capability to clay soils and regions with significantly different climatic conditions, and the model's  
11 interpretability.

12 We acknowledge the detailed comments of the reviewer. The suggestions and concerns are addressed  
13 below.

14 **Specific Comments**

15 **Lines 106-109: Generalization Capability:** Autoencoders are highly dependent on the quality and  
16 diversity of the training data. As shown in Figure 1, the selected region has relatively similar climatic  
17 conditions and soil types, mainly loams with a clay fraction less than 50%. I am curious about the  
18 model's generalization capability to different regions with varying climatic conditions and soil types,  
19 especially for clayey soils. Suggest expanding Section 4.1 to discuss this point and potential approaches  
20 to address this issue. Additionally, suggest discussing the possibility of using other autoencoders, such  
21 as variational autoencoder (VAE).

22 We agree with the reviewer that the sites presented in the paper are very similar with respect to climate  
23 but also with respect to geology due to their vicinity to the Jura. The “transfer” of the model to sites  
24 with different climate or soil properties will be tested in a following study. But motivated by the  
25 comment of the reviewer, we checked the application of the model for a site called ‘Wasen’ in the hilly  
26 region of the Napf mountain in the Prealps of Switzerland. In that region the geology is different, and  
27 the climate is wetter and temperatures in winter are lower compared to the sites of the paper. The model  
28 was able to predict the matric potential with high quality, as shown in the figure below. The NSE for  
29 the model was 0.81 indicating that the model performs well in predicting unseen sites in other locations.  
30 We relate the good model performance to the Autoencoder value (AUV=2.54) that was within the range  
31 of the sites presented in the paper (1.9 to 7.0) and we hypothesize that if the autoencoder value deduced  
32 from the water content time series is within the range of the training data, the model performs well. A  
33 paragraph has been added to Section 4.1 to clarify the model limitations described here.

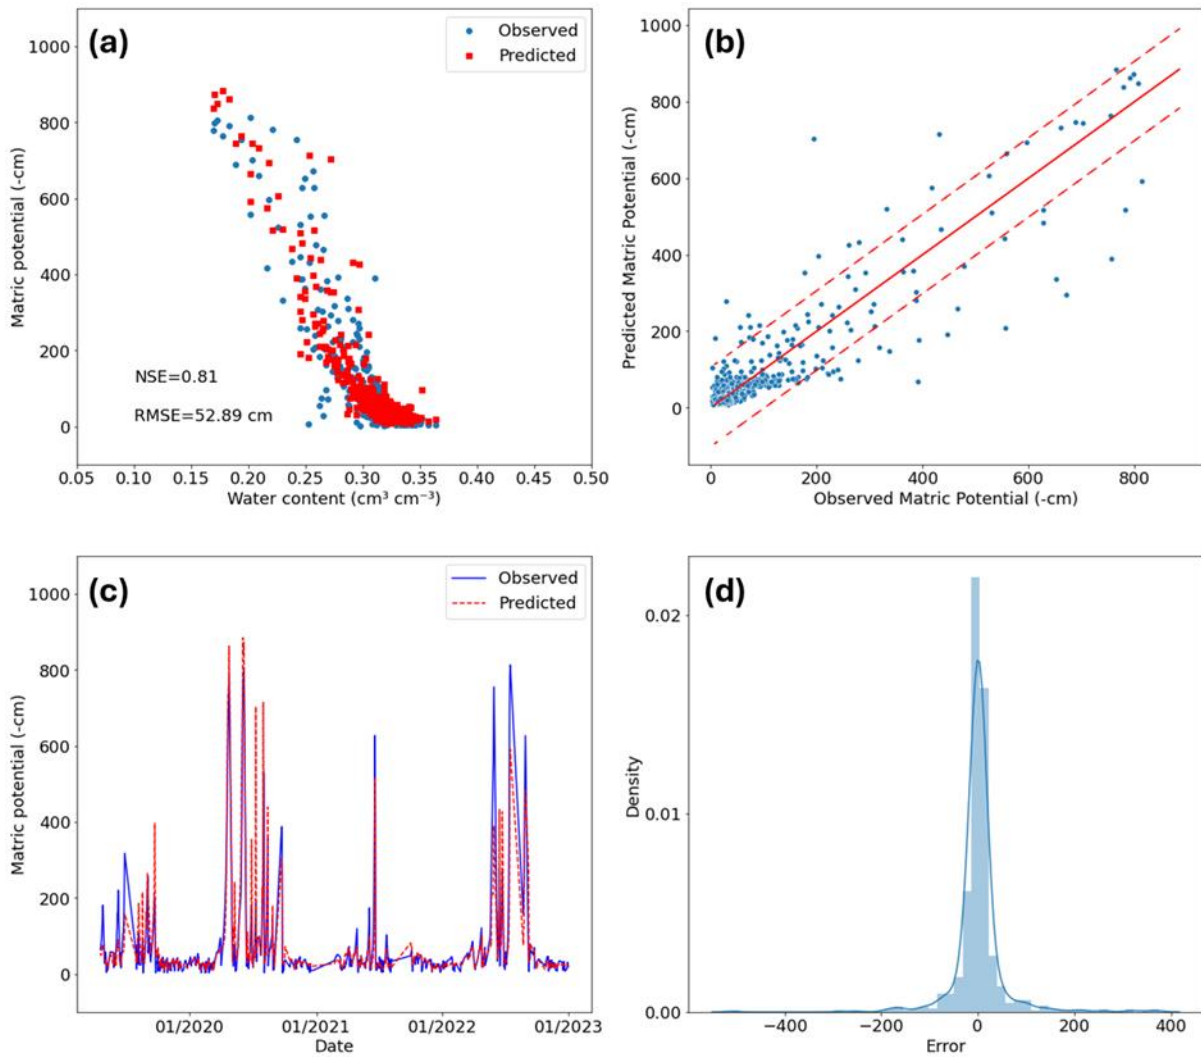

34

35 *Figure 1. Evaluation of the Deep Neural Network with Autoencoder (AUC-DNN) model performance*  
 36 *at the Wasen site for the period 2019-2023. (a) Comparison between the expected Soil Water*  
 37 *characteristics curve (SWC) and the observed SWC. (b) Scatter plot that compares observed data points*  
 38 *with their corresponding simulated values, providing a visual representation of the level of conformity*  
 39 *to the identity line. The two dashed lines represent the 95% confidence interval around the identity line,*  
 40 *providing a visual assessment of the level of agreement. (c) Time series comparison showing the*  
 41 *observed and predicted matric potential for the entire period. (d) Analysis of the distribution of*  
 42 *prediction errors (observed minus modelled value) using positively mild skewed distribution.*

43

44 We are grateful for the comment on the variational autoencoder. This could be especially helpful for  
 45 soils with high variations in water content for the same matric potential value as can be expected for  
 46 clay soils (the autoencoder values were higher for the four sites with clay content  $\geq 30\%$ ). We expect  
 47 that using a variational autoencoder instead of a deterministic autoencoder would improve the  
 48 prediction of matric potential because it leverages regularization in the latent space that explicitly

49 considers the variance (second moment) of the data distribution, leading to a more robust and accurate  
50 representation of the water content timeseries (Xu & Liang, 2021; <https://doi.org/10.1002/wat2.1533>).  
51 A paragraph has been added to Section 4.2 to explain why it is recommended to use the variational  
52 autoencoder in case of clay soil.

53 **Lines 218: Model Interpretability:** The interpretability of the autoencoder's hidden layer  
54 representations is typically challenging. Suggest Including a discussion in the results analysis or  
55 discussion section on potential techniques to visualize the features learned by the autoencoder's hidden  
56 layers, which can help readers understand the model's internal workings

57 The interpretation of the autoencoder representation was shortly discussed in section 4.2 and is now  
58 expanded to clarify the link between the autoencoder value and the water. The analysis indicates that  
59 the value of AUC in the model is not equal to the average water content but is highly affected by it (the  
60 higher the average water content, the higher the autoencoder value). Deterministic autoencoders, which  
61 map inputs deterministically to a lower-dimensional space, tend to capture prominent statistical  
62 properties of the input data. The first moment, or the average, is a primary statistical property. Therefore,  
63 the hidden layer representations (AUV) in a deterministic autoencoder will indeed be influenced by the  
64 average (first moment) of the water content.

65 However, the average water content alone cannot explain the distribution of autoencoder values found  
66 for the nine sites, but the variations of water content must be included as well. This was shown in section  
67 4.2, revealing that the shape of the envelope embracing all variations in water content must be included  
68 to explain the autoencoder value of the nine sites. To confirm that the average water content is not  
69 sufficient to classify the dynamics at different sites. First, we run the autoencoder model to analyze the  
70 yearly changes. Second, we scale the values from 0 to 1, assigning a value of 0 to the lowest yearly  
71 AUV across all sites and a value of 1 to the highest. Finally, we calculate the average yearly water  
72 content and scale it similarly to AUV. To highlight the results here, we quantified the annual changes  
73 of AUV and average water content for two sites that have Type 2 category (see type description in  
74 Figure 6 in the manuscript). AUV tracked changes in average water content but exhibited a different  
75 magnitude of variation. The site with higher sand content (Bellach) showed a higher variation of AUV  
76 compared to the other site (Zunzgen). This observation supports our conclusion in section 4.2 that the  
77 hidden layer is capturing more than just the average water content.

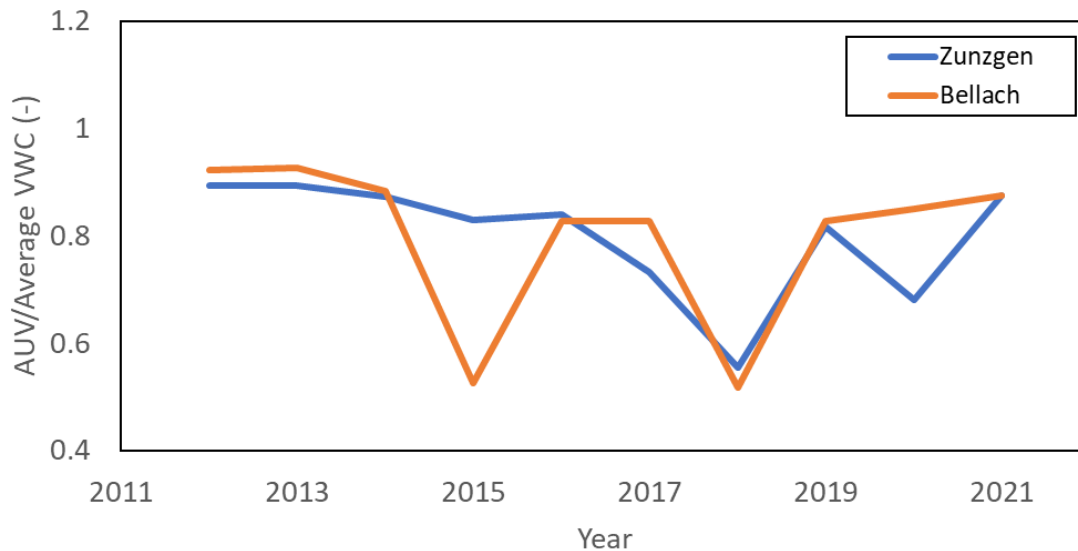

78

79 *Figure 2: Annual Variations in Autoencoder Values and Average Water Content for two Sites. The*  
 80 *x-axis represents the years, while the y-axis shows the ratio of the scaled AUV to the scaled average*  
 81 *water content for the same year. The plot demonstrates how the autoencoder's hidden layer*  
 82 *representations track changes in average water content, reflecting variations and additional properties*  
 83 *derived from the water content time series.*

84 To conclude, we consider average water content as a central parameter for visualizing AUV. However,  
 85 the variability and other higher-order statistical moments (e.g., variance, skewness) significantly  
 86 influence the precise value of these hidden representations. These additional properties could include:

- 87 • Variability (second moment): Reflecting how much the water content fluctuates around the
- 88 mean.
- 89 • Trend: Long-term increase or decrease in water content over time.
- 90 • Periodic Components: Seasonal or cyclical patterns in water content.

91 Therefore, AUV primarily reflects the average water content, combined with other properties derived  
 92 from the variation in the water content time series. This is discussed in section 4.2.

93

94 **Lines 289-290:** Why adopt an NSE value  $> 0.80$  as the criterion for an optimal model? Please provide  
 95 the rationale for selecting this value.

96 Several studies have shown that the performance of hydrological modeling is good when NSE values  
 97 are around 0.75 or higher (Lin et al., 2017; [https://doi.org/10.1061/\(asce\)he.1943-5584.0001580](https://doi.org/10.1061/(asce)he.1943-5584.0001580)). Other  
 98 studies suggest categorizing NSE results into levels to evaluate model simulation outcomes, where an  
 99  $NSE > 0.75$  indicates a very good model, while an  $NSE < 0.5$  signifies unsatisfactory results  
 100 (Moriasi et al., 2007; <https://doi.org/10.13031/2013.23153>). In Gupta et al. (1999;

101 [https://ascelibrary.org/doi/abs/10.1061/\(ASCE\)1084-0699\(1999\)4:2\(135\)](https://ascelibrary.org/doi/abs/10.1061/(ASCE)1084-0699(1999)4:2(135))), an NSE value of  $> 0.80$  was  
102 considered as good ('efficient') and  $\text{NSE} < 0.50$  as poor. These references are now added in the paper.  
103 Here we use  $\text{NSE} > 0.80$  as well as criterion for good model performance. For this study, the chosen  
104 sites are mainly part of a network designed to provide real-time matric potential information for  
105 mitigating soil compaction. We found that when the NSE value is over 0.80, the confidence intervals  
106 for matric potential predictions are as follows: around 70 cm for 68% confidence interval, around 120  
107 cm for 90% confidence interval, and around 150 cm for 95% confidence interval. This indicates that  
108 despite high predictive accuracy, different confidence intervals provide varying levels of precision and  
109 certainty, which can be strategically used for effective soil compaction management:

- 110 • 68% Confidence Interval (around  $\pm 70$  cm): This high precision interval is useful for routine  
111 monitoring and precise irrigation adjustments, ensuring that matric potential levels are optimal  
112 to prevent over-compaction or drying.
- 113 • 90% Confidence Interval (around  $\pm 120$  cm): This balanced interval offers a reliable estimate  
114 for planning soil management practices and designing traffic patterns to minimize soil  
115 compaction, providing a good compromise between precision and confidence.
- 116 • 95% Confidence Interval (around  $\pm 180$  cm): This interval, offering the highest confidence, is  
117 essential for high-risk scenarios and long-term planning. It ensures that comprehensive  
118 measures are in place to prevent severe compaction and maintain soil stability, considering the  
119 widest range of potential matric potential variations.

120 By linking these confidence intervals with high NSE values, we can optimize soil compaction  
121 mitigation strategies, tailoring interventions to match the precision and risk tolerance required for  
122 various applications, from routine monitoring to high-stakes infrastructure planning.

123 Figure 2: The common unit for matric potential is -kPa. Please explain the relationship between the -  
124 kPa and -cm used in this manuscript.

125 The data downloaded from the soil moisture network were given in centibars (cbar) with  $1 \text{ cbar} = 1 \text{ kPa}$   
126 units of pressure, i.e., energy per volume). In the paper we expressed it as a head (length; energy per  
127 weight) considering water density of  $1000 \text{ kg m}^{-3}$  and gravity acceleration of  $10 \text{ m s}^{-2}$ , resulting in units  
128 of cm that are  $1/10$  of kPa. This is now stated in section 2.

129 Equation 1: Please ensure that all parameters are clearly defined after the equation, and that their  
130 mathematical notation (bold, italic) is consistent throughout the manuscript.

131 We rearranged the text to define the parameters after the equations and checked the notation throughout  
132 the manuscript.
